# Supplementary material for: Prediction of short-term antidepressant response using probabilistic graphical models with replication across multiple drugs and treatment settings
Source: PubMed Central journal article supplement (PMC8134509; doi:10.1038/s41386-020-00943-x), 2021-01-15
Supplement: 41386_2020_943_MOESM1_ESM.pdf [file 41386_2020_943_MOESM1_ESM.pdf]

A1 Stratum: Symptom Cluster

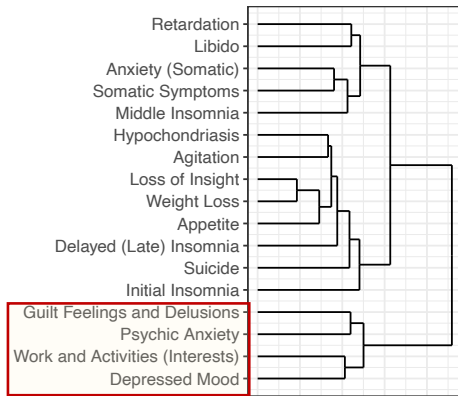

A2 Stratum: Symptom Cluster

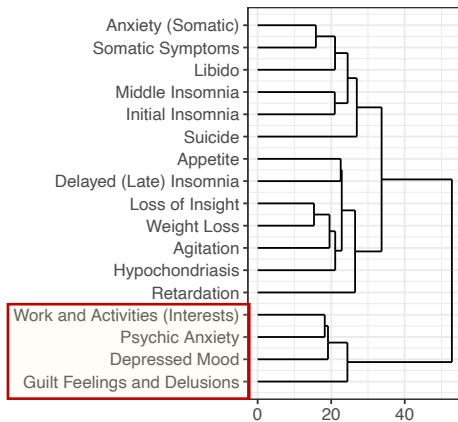

A3 Stratum: Symptom Cluster

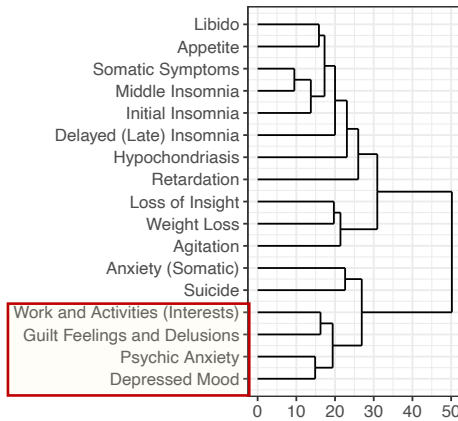

B1 Stratum: Symptom Cluster

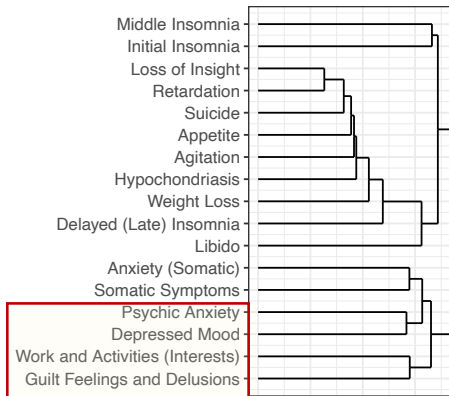

B2 Stratum: Symptom Cluster

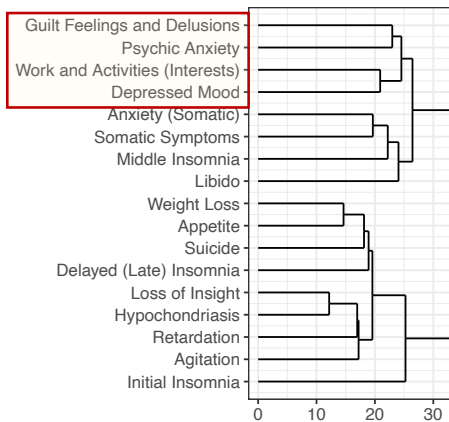

B3 Stratum: Symptom Cluster

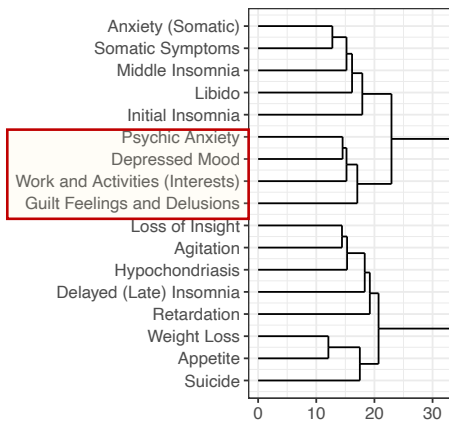

C1 Stratum: Symptom Cluster

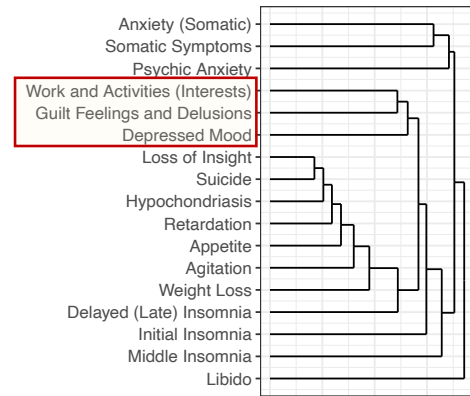

C2 Stratum: Symptom Cluster

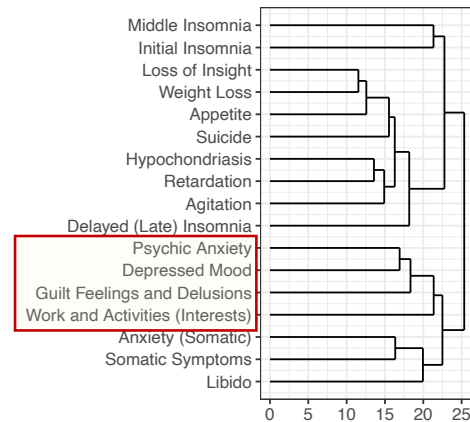

C3 Stratum: Symptom Cluster

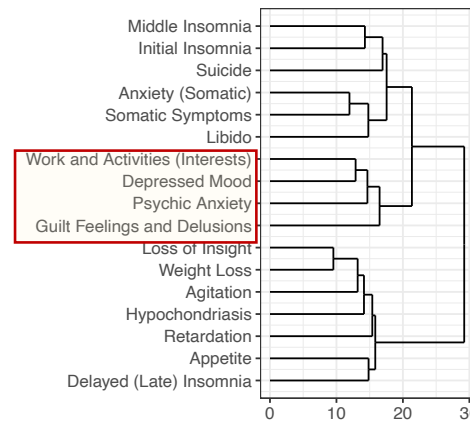

Supplementary Fig. 1
