# Supplementary material for: Prediction of short-term antidepressant response using probabilistic graphical models with replication across multiple drugs and treatment settings
Source: PubMed Central journal article supplement (PMC8134509; doi:10.1038/s41386-020-00943-x), 2021-01-15

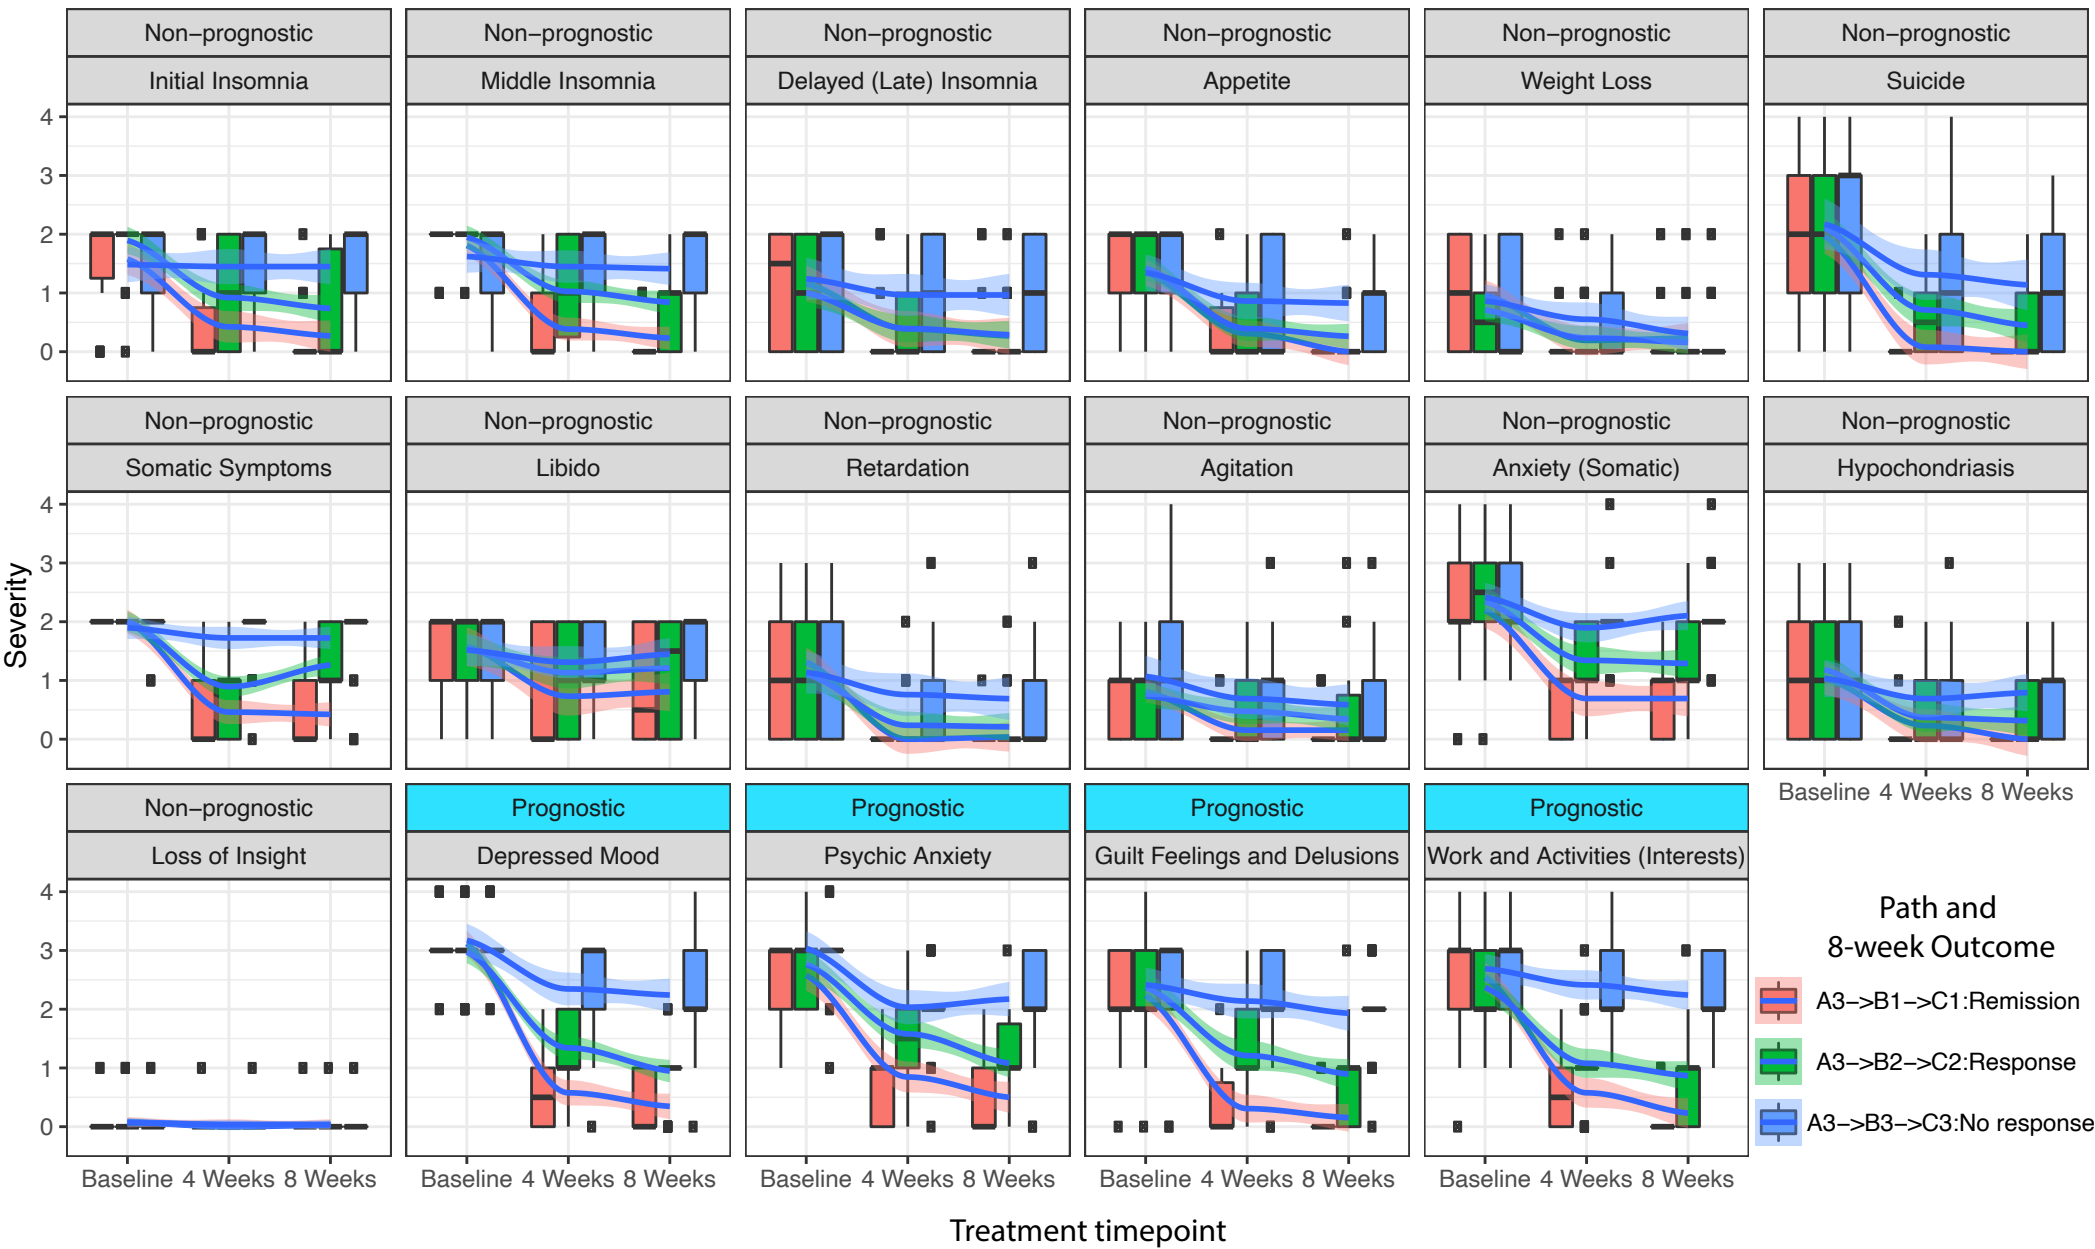

Supplement: 41386_2020_943_MOESM2_ESM.pdf [file 41386_2020_943_MOESM2_ESM.pdf]
